# Supplementary material for: Theoretical study on molecular packing and electronic structure of bi-1,3,4-oxadiazole derivatives
Source: Royal Society of Chemistry journal article supplement (doi:10.1039/c4ra06405d), 2014-01-01
Supplement: c4ra06405d1.pdf [file c4ra06405d1.pdf]

## Electronic Supplementary Information for

### **Theoretical study on molecular packing and electronic structure of bi-1,3,4-oxadiazole derivative**

Haitao Wang,<sup>a,b</sup> Fu-Quan Bai,<sup>b</sup> Xiaoshi Jia,<sup>a</sup> Di Cao,<sup>a</sup> Ravva Mehesh Kumar,<sup>c</sup> Jean-luc Bredas,<sup>c</sup> Songnan Qu,<sup>d</sup> Binglian Bai,<sup>e</sup> Hong-Xing Zhang,<sup>\*b</sup> Min Li<sup>\*a</sup>

<sup>a</sup> *Key Laboratory of Automobile Materials (MOE) & College of Materials Science and Engineering, Jilin University, Changchun 130012, China. E-mail: [minli@mail.jlu.edu.cn](mailto:minli@mail.jlu.edu.cn).*

<sup>b</sup> *Key Laboratory of Theoretical and Computational Chemistry, Institute of Theoretical Chemistry, Jilin University, Changchun 130023, China. E-mail: [zhanghx@mail.jlu.edu.cn](mailto:zhanghx@mail.jlu.edu.cn)*

<sup>c</sup> *School of Chemistry and Biochemistry and Center for Organic Photonics and Electronics, Georgia Institute of Technology, Atlanta, GA 30332, United states.*

<sup>d</sup> *Key Laboratory of Excited State Processes, Changchun Institute of Optics, Fine Mechanics and Physics, Chinese Academy of Sciences, Changchun 130033, China.*

<sup>e</sup> *College of Physics, Jilin University, Changchun 130012, China.*

## Contents

Figure S1 The UV-vis absorption spectrum of BOXD-NP in CHL solution ( $\sim 10^{-5}$  M).

Figure S2 Evolution of the Oscillation strength (INDO/6-31G\*\*) of the lowest two excited states of BOXD-NP dimer over  $y$ -displacement (with  $x$ -displacement fixed at 0 Å).

Table S1 Electronic process of BOXD-NP calculated with different methods.

Table S2 The single point energies of BOXD-NP dimers (M062x/6-31G\*\* method).

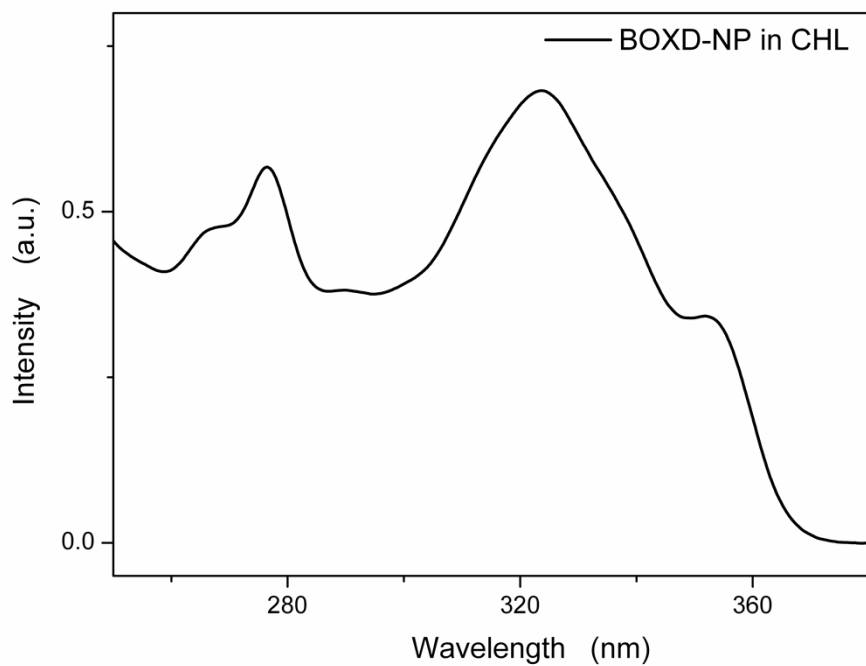

Figure S1 The UV-vis absorption spectrum of BOXD-NP in CHL solution ( $\sim 10^{-5}$  M).

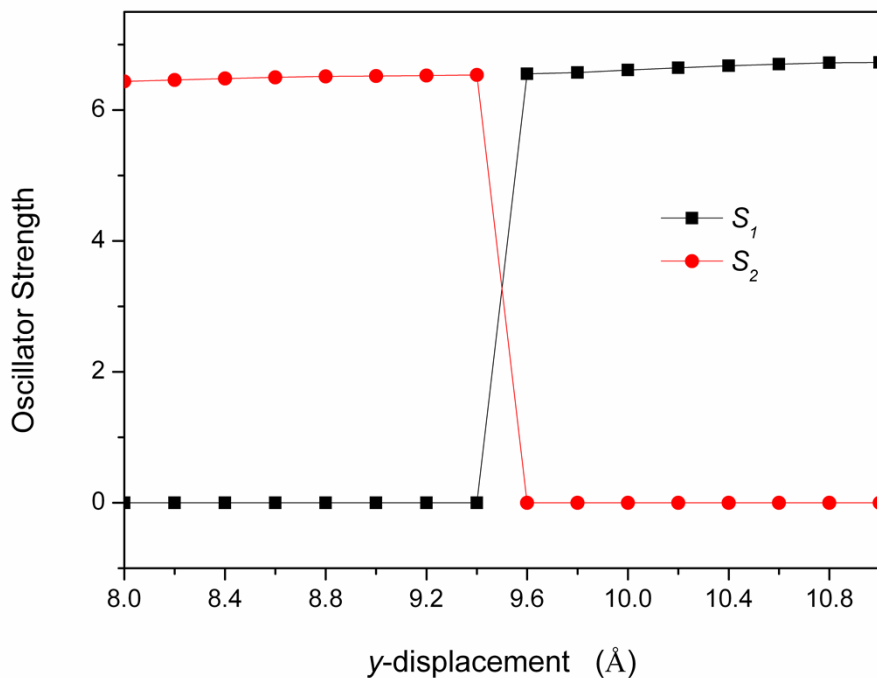

Figure S2 Evolution of the Oscillation strength (INDO/6-31G\*\*) of the lowest two excited states of BOXD-NP dimer over  $y$ -displacement (with  $x$ -displacement fixed at 0 Å).

Table S1 Electronic process of BOXD-NP calculated with different methods.

|                | B3LYP/6-311+G**  |                  |                  |                  | M062x/6-311+G**  |                  |                  |                  | CAM-B3LYP        |                  |                  |                  |
|----------------|------------------|------------------|------------------|------------------|------------------|------------------|------------------|------------------|------------------|------------------|------------------|------------------|
|                | GAS              |                  | CHL              |                  | GAS              |                  | CHL              |                  | GAS              |                  | CHL              |                  |
| S <sub>1</sub> | <b>3.3910 eV</b> | <b>365.63 nm</b> | <b>3.2519 eV</b> | <b>381.27 nm</b> | <b>4.1205 eV</b> | <b>300.89 nm</b> | <b>4.0216 eV</b> | <b>308.30 nm</b> | <b>4.0719 eV</b> | <b>304.48 nm</b> | <b>3.9698 eV</b> | <b>312.32 nm</b> |
|                | <b>(1.0632)</b>  |                  | <b>(1.1159)</b>  |                  | <b>(1.3170)</b>  |                  | <b>(1.5043)</b>  |                  | <b>f=1.3203</b>  |                  | <b>f=1.5063</b>  |                  |
|                | 101->102         | 0.69731          | 101->102         | 0.69640          | 99->104          | -0.12001         | 99->102          | 0.11694          | 99->104          | -0.12437         | 99->102          | 0.13705          |
|                |                  |                  |                  |                  | 100->103         |                  | 99->104          | -0.10409         | 100->103         | 0.29476          | 99->104          | 0.10338          |
|                |                  |                  |                  |                  | 0.28292          |                  | 100->103         | -0.28522         | 101->102         | 0.59262          | 100->103         | -0.29482         |
|                |                  |                  |                  | 101->102         |                  | 101->102         | 0.59952          |                  |                  | 101->102         | 0.58618          |                  |
|                |                  |                  |                  | 0.60297          |                  |                  |                  |                  |                  |                  |                  |                  |
| S <sub>2</sub> | <b>3.5976 eV</b> | <b>344.63 nm</b> | <b>3.4599 eV</b> | <b>358.35 nm</b> | <b>4.3021 eV</b> | <b>288.20 nm</b> | <b>4.2171 eV</b> | <b>294.01 nm</b> | <b>4.2609 eV</b> | <b>290.98 nm</b> | <b>4.1732 eV</b> | <b>297.10 nm</b> |
|                | <b>(0)</b>       |                  | <b>(0)</b>       |                  | <b>(0)</b>       |                  | <b>(0)</b>       |                  | <b>f=0.0000</b>  |                  | <b>f=0.0000</b>  |                  |
|                | 99->103          | -0.14678         | 99->103          | 0.11231          | 98->102          | -0.12821         | 98->104          | 0.13658          | 98->102          | -0.11012         | 98->104          | -0.13585         |
|                | 100->102         | 0.67043          | 100->102         | 0.68722          | 98->104          | -0.17032         | 99->103          | 0.20483          | 98->104          | -0.17413         | 99->103          | 0.19911          |
|                |                  |                  |                  |                  | 99->103          | -0.27219         | 100->102         | 0.49525          | 99->103          | -0.26626         | 100->102         | 0.47923          |
|                |                  |                  |                  |                  | 100->102         | 0.47011          | 100->106         | 0.12558          | 100->102         | 0.46029          | 100->104         | -0.11763         |
|                |                  |                  |                  |                  | 100->106         | 0.13873          | 101->103         | -0.35841         | 100->106         | 0.14483          | 100->106         | 0.12516          |
|                |                  |                  |                  |                  | 101->103         | 0.28630          | 101->105         | -0.15763         | 101->103         | 0.30725          | 101->103         | -0.37181         |
|                |                  |                  |                  | 101->105         | 0.20617          |                  |                  | 101->105         | 0.19037          | 101->105         | -0.14259         |                  |
| S <sub>3</sub> | <b>3.8500 eV</b> | <b>322.04 nm</b> | <b>3.7724 eV</b> | <b>328.66 nm</b> | <b>4.4222 eV</b> | <b>280.37 nm</b> | <b>4.3963 eV</b> | <b>282.02 nm</b> | <b>4.3824 eV</b> | <b>282.91 nm</b> | <b>4.3499 eV</b> | <b>285.03 nm</b> |
|                | <b>(0.3296)</b>  |                  | <b>(0.4787)</b>  |                  | <b>(0.2955)</b>  |                  | <b>(0.4064)</b>  |                  | <b>f=0.2833</b>  |                  | <b>f=0.3833</b>  |                  |
|                | 98->103          | 0.17182          | 98->103          | 0.15569          | 98->103          | 0.33715          | 98->103          | 0.33333          | 97->104          | -0.10385         | 98->103          | 0.33441          |
|                | 99->102          | 0.61365          | 99->102          | 0.65542          | 99->102          | 0.45347          | 99->102          | 0.47918          | 98->103          | 0.34131          | 99->102          | 0.46880          |
|                | 100->103         | -0.12511         | 100->103         | 0.10444          | 100->105         | -0.24241         | 99->104          | 0.13786          | 99->102          | 0.44807          | 99->104          | -0.15989         |
| 100->105       | -0.13231         | 101->104         | 0.11164          | 101->104         | 0.18985          | 100->103         | 0.14386          | 99->104          | 0.12264          | 100->103         | 0.15958          |                  |

|                      |                  |                  |                  |                  |                  |                  |                  |                  |                  |                  |                  |                  |
|----------------------|------------------|------------------|------------------|------------------|------------------|------------------|------------------|------------------|------------------|------------------|------------------|------------------|
|                      | 101->104         | -0.20424         |                  |                  | 101->106         | -0.18047         | 100->105         | 0.20562          | 100->103         | -0.10390         | 100->105         | 0.19800          |
|                      |                  |                  |                  |                  |                  |                  | 101->104         | 0.10457          | 100->105         | -0.23737         | 101->106         | -0.19943         |
|                      |                  |                  |                  |                  |                  |                  | 101->106         | -0.19067         | 101->104         | 0.15833          |                  |                  |
|                      |                  |                  |                  |                  |                  |                  |                  |                  | 101->106         | -0.19544         |                  |                  |
| <b>S<sub>4</sub></b> | <b>3.9210 eV</b> | <b>316.20 nm</b> | <b>3.8669 eV</b> | <b>320.63 nm</b> | <b>4.5273 eV</b> | <b>273.86 nm</b> | <b>4.5073 eV</b> | <b>275.08 nm</b> | <b>4.4911 eV</b> | <b>276.07 nm</b> | <b>4.4672 eV</b> | <b>277.55 nm</b> |
|                      | <b>(0)</b>       |                  | <b>(0)</b>       |                  | <b>(0)</b>       |                  | <b>(0)</b>       |                  | <b>f=0.0000</b>  |                  | <b>f=0.0000</b>  |                  |
|                      | 101->103         | 0.68331          | 100->104         | -0.10921         | 98->102          | 0.27365          | 98->102          | 0.30811          | 98->102          | 0.28503          | 98->102          | 0.31402          |
|                      |                  |                  | 101->103         | 0.68460          | 99->103          | 0.20517          | 98->104          | 0.14654          | 98->104          | 0.11243          | 98->104          | -0.16578         |
|                      |                  |                  |                  |                  | 99->105          | 0.10831          | 99->103          | 0.28221          | 99->103          | 0.21899          | 99->103          | 0.29260          |
|                      |                  |                  |                  |                  | 100->102         | 0.12677          | 100->104         | -0.27027         | 99->105          | 0.11551          | 100->104         | 0.25287          |
|                      |                  |                  |                  |                  | 100->104         | 0.30112          | 100->106         | 0.15662          | 100->102         | 0.10566          | 100->106         | 0.18144          |
|                      |                  |                  |                  |                  | 100->106         | -0.12013         | 101->103         | 0.33031          | 100->104         | 0.29561          | 101->103         | 0.29969          |
|                      |                  |                  |                  |                  | 101->103         | 0.40316          | 101->105         | -0.26318         | 100->106         | -0.14604         | 101->105         | -0.26566         |
|                      |                  |                  |                  |                  | 101->105         | -0.24064         |                  |                  | 101->103         | 0.37071          |                  |                  |
|                      |                  |                  |                  |                  |                  |                  |                  |                  | 101->105         | -0.24846         |                  |                  |
| <b>S<sub>5</sub></b> | <b>4.0765 eV</b> | <b>304.14 nm</b> | <b>3.9900 eV</b> | <b>310.74 nm</b> | <b>4.7644 eV</b> | <b>260.23 nm</b> | <b>4.7004 eV</b> | <b>263.77 nm</b> | <b>4.7336 eV</b> | <b>261.92 nm</b> | <b>4.6693 eV</b> | <b>265.53 nm</b> |
|                      | <b>(0.0860)</b>  |                  | <b>(0.0889)</b>  |                  | <b>(0.6256)</b>  |                  | <b>(0.5227)</b>  |                  | <b>f=0.5951</b>  |                  | <b>f=0.4829</b>  |                  |
|                      | 99->102          | 0.17433          | 99->102          | -0.12503         | 97->102          | -0.15098         | 97->102          | -0.15170         | 97->102          | -0.16701         | 97->102          | 0.16607          |
|                      | 99->104          | 0.12251          | 99->104          | 0.11811          | 99->102          | -0.22239         | 99->102          | -0.15598         | 99->102          | -0.20804         | 99->102          | 0.14496          |
|                      | 100->103         | 0.66003          | 100->103         | 0.66271          | 99->106          | 0.10210          | 99->106          | 0.10168          | 99->106          | 0.11883          | 99->106          | -0.11631         |
|                      |                  |                  |                  |                  | 100->103         | 0.37132          | 100->103         | -0.35411         | 100->103         | 0.34870          | 100->103         | 0.33026          |
|                      |                  |                  |                  |                  | 100->105         | -0.22340         | 100->105         | 0.26189          | 100->105         | -0.24253         | 100->105         | -0.27777         |
|                      |                  |                  |                  |                  | 101->104         | 0.46181          | 101->104         | 0.48118          | 101->104         | 0.46087          | 101->104         | 0.47209          |
| <b>S<sub>6</sub></b> | <b>4.1291 eV</b> | <b>300.27 nm</b> | <b>4.0780 eV</b> | <b>304.03 nm</b> | <b>5.2767 eV</b> | <b>234.96 nm</b> | <b>5.1174 eV</b> | <b>242.28 nm</b> | <b>5.2909 eV</b> | <b>234.33 nm</b> | <b>5.1081 eV</b> | <b>242.72 nm</b> |
|                      | <b>(0)</b>       |                  | <b>(0)</b>       |                  | <b>(0)</b>       |                  | <b>(0)</b>       |                  | <b>f=0.0000</b>  |                  | <b>f=0.0000</b>  |                  |
|                      | 98->102          | 0.42293          | 98->102          | 0.54328          | 98->102          | 0.30216          | 98->102          | 0.33802          | 98->102          | 0.35468          | 98->102          | -0.33388         |

|                      |                  |                  |                  |                  |                  |                  |                  |                  |                  |                  |                  |                  |
|----------------------|------------------|------------------|------------------|------------------|------------------|------------------|------------------|------------------|------------------|------------------|------------------|------------------|
|                      | 99->103          | 0.27088          | 99->103          | 0.23398          | 99->103          | 0.14999          | 99->103          | 0.27284          | 99->103          | 0.25091          | 99->103          | -0.26908         |
|                      | 100->102         | 0.18792          | 100->102         | -0.12341         | 100->102         | 0.43083          | 100->102         | -0.29525         | 100->102         | 0.31587          | 100->102         | 0.26747          |
|                      | 100->104         | -0.18973         | 100->104         | -0.14314         | 100->104         | -0.24466         | 100->104         | 0.36228          | 100->104         | -0.35270         | 100->104         | 0.36796          |
|                      | 100->106         | -0.16817         | 100->106         | -0.15438         | 100->106         | -0.13224         | 101->103         | -0.16906         | 101->103         | -0.13401         | 101->103         | 0.11599          |
|                      | 101->105         | -0.35498         | 101->105         | -0.27129         | 101->103         | -0.30366         | 101->105         | 0.18746          | 101->105         | 0.17019          | 101->105         | -0.23263         |
| <b>S<sub>7</sub></b> | <b>4.2203 eV</b> | <b>293.78 nm</b> | <b>4.1822 eV</b> | <b>296.45 nm</b> | <b>5.3495 eV</b> | <b>231.77 nm</b> | <b>5.2607 eV</b> | <b>235.68 nm</b> | <b>5.3948 eV</b> | <b>229.82 nm</b> | <b>5.3113 eV</b> | <b>233.44 nm</b> |
|                      | <b>(0.2270)</b>  |                  | <b>(0.1257)</b>  |                  | <b>(0)</b>       |                  | <b>(0)</b>       |                  | <b>f=0.0000</b>  |                  | <b>f=0.0000</b>  |                  |
|                      | 99->102          | 0.24852          | 99->102          | -0.16043         | 97->103          | 0.12280          | 97->103          | 0.12700          | 97->103          | 0.15677          | 97->103          | 0.13121          |
|                      | 100->105         | 0.12479          | 100->105         | 0.14076          | 98->102          | 0.19928          | 99->103          | 0.17393          | 99->103          | 0.20934          | 99->103          | 0.15604          |
|                      | 101->104         | 0.63006          | 101->104         | 0.65420          | 99->103          | 0.30314          | 100->102         | 0.35457          | 100->102         | -0.33263         | 100->102         | 0.38540          |
|                      |                  |                  |                  |                  | 100->102         | -0.15079         | 100->106         | -0.24118         | 100->106         | 0.23061          | 100->106         | -0.26813         |
|                      |                  |                  |                  |                  | 100->104         | -0.27134         | 101->103         | 0.34283          | 101->103         | 0.33179          | 101->103         | 0.31965          |
|                      |                  |                  |                  |                  | 100->106         | 0.15016          | 101->105         | 0.35176          | 101->105         | 0.34668          | 101->105         | 0.32439          |
|                      |                  |                  |                  |                  | 101->103         | 0.24878          |                  |                  |                  |                  |                  |                  |
|                      |                  |                  |                  |                  | 101->105         | 0.38456          |                  |                  |                  |                  |                  |                  |

Table S2 The single point energies of BOXD-NP dimers (M062x/6-31G\*\* method).

| y \ x | 0         | 0.2       | 0.4       | 0.6       | 0.8       | 1.0       | 1.2       | 1.4       | 1.6       | 1.8       | 2.0       |
|-------|-----------|-----------|-----------|-----------|-----------|-----------|-----------|-----------|-----------|-----------|-----------|
| 0     | 1.04792   | 0.31423   | -1.63234  | -4.27983  | -7.10833  | -9.58959  | -11.35867 | -12.45107 | -12.9014  | -12.60609 | -11.88555 |
| 0.2   | 0.1964    | -0.45828  | -2.2594   | -4.75599  | -7.43227  | -9.71107  | -11.29831 | -12.2982  | -12.71848 | -12.48338 | -11.81341 |
| 0.4   | -2.00812  | -2.53387  | -4.06025  | -6.21474  | -8.49706  | -10.38966 | -11.65813 | -12.42008 | -12.64887 | -12.31931 | -11.64    |
| 0.6   | -4.94085  | -5.34884  | -6.54704  | -8.23843  | -9.98913  | -11.40906 | -12.28459 | -12.67726 | -12.61032 | -12.09897 | -11.36824 |
| 0.8   | -7.92772  | -8.23405  | -9.09036  | -10.28794 | -11.5263  | -12.42191 | -12.86144 | -12.88273 | -12.48297 | -11.80006 | -11.00851 |
| 1.0   | -10.34273 | -10.53255 | -11.08499 | -11.93637 | -12.74217 | -13.15601 | -13.16093 | -12.8244  | -12.18519 | -11.37137 | -10.55005 |
| 1.2   | -11.83473 | -11.97763 | -12.3572  | -12.97316 | -13.50261 | -13.58011 | -13.22567 | -12.58427 | -11.78053 | -10.8895  | -10.07758 |
| 1.4   | -12.42932 | -12.65849 | -13.02309 | -13.50059 | -13.83674 | -13.70786 | -13.11673 | -12.29805 | -11.40565 | -10.51969 | -9.74805  |
| 1.6   | -12.3389  | -12.76665 | -13.19815 | -13.63547 | -13.84848 | -13.59966 | -12.96743 | -12.12109 | -11.23068 | -10.36552 | -9.6099   |
| 1.8   | -11.70382 | -12.38494 | -12.99111 | -13.45356 | -13.64539 | -13.43576 | -12.8966  | -12.15078 | -11.33443 | -10.52039 | -9.79467  |
| 2.0   | -10.94087 | -11.86082 | -12.63706 | -13.1824  | -13.42617 | -13.34333 | -12.96665 | -12.37377 | -11.6895  | -10.96116 | -10.25954 |
| 2.2   | -10.50221 | -11.56967 | -12.4607  | -13.06054 | -13.38318 | -13.43278 | -13.20936 | -12.75975 | -12.19421 | -11.53674 | -10.84521 |
| 2.4   | -10.54961 | -11.66934 | -12.57918 | -13.15257 | -13.45473 | -13.59508 | -13.49703 | -13.16435 | -12.71737 | -12.11332 | -11.42164 |
| 2.6   | -11.02581 | -12.09629 | -12.9404  | -13.40369 | -13.63918 | -13.76639 | -13.73302 | -13.46873 | -13.06664 | -12.53323 | -11.85769 |
| 2.8   | -11.80884 | -12.72472 | -13.41707 | -13.7282  | -13.83735 | -13.8816  | -13.76759 | -13.50066 | -13.14968 | -12.6915  | -12.08508 |
| 3.0   | -12.65964 | -13.35254 | -13.81318 | -13.97279 | -13.92501 | -13.77981 | -13.52192 | -13.1972  | -12.88829 | -12.51187 | -12.00751 |
| 3.2   | -13.32496 | -13.78343 | -13.98982 | -13.92139 | -13.6928  | -13.34438 | -12.94723 | -12.57672 | -12.26884 | -11.98665 | -11.61477 |
| 3.4   | -13.69468 | -13.94894 | -13.90096 | -13.57987 | -13.12081 | -12.59075 | -12.11266 | -11.72344 | -11.4411  | -11.25382 | -10.98818 |
| 3.6   | -13.81902 | -13.87897 | -13.62805 | -13.09229 | -12.43391 | -11.78213 | -11.24236 | -10.85497 | -10.61137 | -10.48668 | -10.27195 |
| 3.8   | -13.71467 | -13.64145 | -13.27031 | -12.618   | -11.87759 | -11.16207 | -10.57822 | -10.19558 | -9.988    | -9.85498  | -9.64765  |
| 4.0   | -13.49038 | -13.37856 | -12.97277 | -12.33335 | -11.61925 | -10.8919  | -10.29714 | -9.90459  | -9.68373  | -9.51327  | -9.27495  |
| 4.2   | -13.25785 | -13.14367 | -12.80478 | -12.2887  | -11.68612 | -11.0547  | -10.49973 | -10.08869 | -9.78067  | -9.52512  | -9.17794  |
| 4.4   | -13.0624  | -13.01827 | -12.80267 | -12.45355 | -12.01831 | -11.54626 | -11.07343 | -10.64453 | -10.25694 | -9.85918  | -9.34572  |

|     |           |           |           |           |           |           |           |           |           |           |           |
|-----|-----------|-----------|-----------|-----------|-----------|-----------|-----------|-----------|-----------|-----------|-----------|
| 4.6 | -12.98481 | -13.02888 | -12.94914 | -12.75884 | -12.51154 | -12.198   | -11.79277 | -11.37435 | -10.90652 | -10.33743 | -9.65688  |
| 4.8 | -13.04072 | -13.12701 | -13.14073 | -13.10424 | -13.00103 | -12.79918 | -12.47179 | -12.01573 | -11.435   | -10.73214 | -9.91405  |
| 5.0 | -13.20418 | -13.27379 | -13.32165 | -13.36172 | -13.34553 | -13.19795 | -12.88846 | -12.41155 | -11.77465 | -10.96828 | -10.04098 |
| 5.2 | -13.40637 | -13.40915 | -13.42553 | -13.45705 | -13.45218 | -13.33044 | -13.03919 | -12.57393 | -11.90752 | -11.02491 | -10.02098 |
| 5.4 | -13.54794 | -13.45503 | -13.39348 | -13.36031 | -13.29789 | -13.13936 | -12.88037 | -12.44535 | -11.79664 | -10.89731 | -9.85278  |
| 5.6 | -13.57938 | -13.33157 | -13.16938 | -13.05992 | -12.94806 | -12.77682 | -12.53181 | -12.13337 | -11.4949  | -10.61441 | -9.55525  |
| 5.8 | -13.48994 | -13.09509 | -12.83225 | -12.67367 | -12.55522 | -12.40185 | -12.18854 | -11.80507 | -11.16038 | -10.28221 | -9.21374  |
| 6.0 | -13.32087 | -12.85923 | -12.55751 | -12.39755 | -12.30601 | -12.18487 | -11.98319 | -11.60359 | -10.94008 | -10.03931 | -8.94029  |
| 6.2 | -13.08344 | -12.65719 | -12.40298 | -12.30192 | -12.27745 | -12.21748 | -12.03789 | -11.63974 | -10.94873 | -9.99495  | -8.84454  |
| 6.4 | -12.79651 | -12.50986 | -12.38999 | -12.41268 | -12.49435 | -12.50362 | -12.35152 | -11.93283 | -11.20009 | -10.16854 | -8.94629  |
| 6.6 | -12.52898 | -12.42275 | -12.46615 | -12.65621 | -12.88436 | -12.97603 | -12.83875 | -12.38638 | -11.6067  | -10.48834 | -9.18553  |
| 6.8 | -12.3009  | -12.37271 | -12.60689 | -12.96635 | -13.30618 | -13.46417 | -13.34592 | -12.85007 | -12.00768 | -10.81889 | -9.43255  |
| 7.0 | -12.14789 | -12.3646  | -12.75613 | -13.23003 | -13.63547 | -13.82446 | -13.68385 | -13.14361 | -12.25023 | -11.02905 | -9.61019  |
| 7.2 | -12.12669 | -12.4283  | -12.8689  | -13.36493 | -13.76409 | -13.89979 | -13.69019 | -13.12846 | -12.22933 | -11.01478 | -9.62223  |
| 7.4 | -12.22847 | -12.50907 | -12.91587 | -13.33389 | -13.61601 | -13.66971 | -13.41977 | -12.83853 | -11.93393 | -10.7633  | -9.42492  |
| 7.6 | -12.40387 | -12.59765 | -12.87852 | -13.14956 | -13.28324 | -13.24409 | -12.9371  | -12.30618 | -11.42549 | -10.32727 | -9.0745   |
| 7.8 | -12.54162 | -12.62301 | -12.74346 | -12.8382  | -12.83866 | -12.67973 | -12.28572 | -11.64427 | -10.78755 | -9.75555  | -8.62047  |
| 8.0 | -12.5214  | -12.52592 | -12.51942 | -12.4637  | -12.32073 | -12.0262  | -11.56953 | -10.91517 | -10.0838  | -9.14437  | -8.1137   |
| 8.2 | -12.37285 | -12.32325 | -12.2475  | -12.08166 | -11.80887 | -11.40656 | -10.88727 | -10.21127 | -9.42216  | -8.55486  | -7.61008  |
| 8.4 | -12.11926 | -12.09262 | -11.9871  | -11.74625 | -11.38603 | -10.9058  | -10.32384 | -9.63781  | -8.88755  | -8.078    | -7.21351  |
| 8.6 | -11.78331 | -11.82238 | -11.75003 | -11.51211 | -11.1246  | -10.59931 | -9.97873  | -9.28013  | -8.54307  | -7.76983  | -6.95007  |
| 8.8 | -11.43669 | -11.57754 | -11.5742  | -11.3837  | -10.99787 | -10.46413 | -9.84616  | -9.14094  | -8.38904  | -7.62057  | -6.82069  |
| 9.0 | -11.09917 | -11.38034 | -11.47715 | -11.35237 | -10.99272 | -10.47004 | -9.85509  | -9.14097  | -8.36139  | -7.57884  | -6.78433  |
| 9.2 | -10.8915  | -11.25718 | -11.41691 | -11.34854 | -11.03208 | -10.54032 | -9.92313  | -9.18173  | -8.3875   | -7.59352  | -6.80943  |
| 9.4 | -10.79415 | -11.19206 | -11.3522  | -11.28585 | -10.9966  | -10.53086 | -9.91619  | -9.1908   | -8.42431  | -7.64546  | -6.86243  |

|      |           |           |           |           |           |           |          |          |          |          |          |
|------|-----------|-----------|-----------|-----------|-----------|-----------|----------|----------|----------|----------|----------|
| 9.6  | -10.80193 | -11.15816 | -11.27548 | -11.14998 | -10.84721 | -10.39527 | -9.78976 | -9.09251 | -8.36393 | -7.6327  | -6.90601 |
| 9.8  | -10.84902 | -11.09739 | -11.12249 | -10.9472  | -10.5887  | -10.10743 | -9.52688 | -8.54274 | -8.18718 | -7.53597 | -6.89044 |
| 10.0 | -10.85074 | -10.95615 | -10.85781 | -10.57606 | -10.14306 | -9.64006  | -9.1027  | -8.29861 | -7.96313 | -7.40689 | -6.84852 |
| 10.2 | -10.73278 | -10.67852 | -10.43776 | -10.02852 | -9.53862  | -9.02869  | -8.55315 | -8.12704 | -7.69443 | -7.24677 | -6.80649 |
| 10.4 | -10.47219 | -10.25962 | -9.88182  | -9.37145  | -8.83475  | -8.33171  | -7.95514 | -7.66932 | -7.38423 | -7.07608 | -6.74374 |
| 10.6 | -10.1176  | -9.77304  | -9.26888  | -8.68619  | -8.13025  | -7.69332  | -7.4097  | -7.23643 | -7.09301 | -6.91437 | -6.66907 |
| 10.8 | -9.74405  | -9.33105  | -8.75786  | -8.13754  | -7.60393  | -7.24294  | -7.03723 | -6.9436  | -6.89997 | -6.79036 | -6.58537 |
| 11.0 | -9.44368  | -9.02653  | -8.46286  | -7.87907  | -7.38799  | -7.05932  | -6.89705 | -6.83694 | -6.81414 | -6.70931 | -6.50674 |
